# Supplementary material for: Characterization of bioactive and fruit quality compounds of promising mango genotypes grown in Himalayan plain region
Source: PeerJ. 2023 Aug 18;11:e15867. doi: 10.7717/peerj.15867 (PMC10441536; doi:10.7717/peerj.15867)
Supplement: Supplemental Information 1 [file peerj-11-15867-s001.xlsx]

## Sheet: Sheet2
	PHYSIOLOGICAL LOSS IN WEIGHT					TOTAL CAROTENOID					TOTAL PHENOLIC CONTENT
Genotypes	R1	R2	R3	mean	Genotypes	R1	R2	R3	mean	Genotypes	R1	R2	R3	mean
Alphonso	6.272	6.656	6.272	6.4	Alphonso	6.468	6.864	6.468	6.6	Alphonso	465.99	494.52	465.99	475.5
Amrapali	6.386	6.138	6.076	6.2	Amrapali	9.373	9.009	8.918	9.1	Amrapali	456.599	438.867	434.434	443.3
Bombai	12.376	11.424	11.9	11.9	Bombai	5.824	5.376	5.6	5.6	Bombai	488.072	450.528	469.3	469.3
Chausa	10.3	9.9	9.8	10	Chausa	5.768	5.544	5.488	5.6	Chausa	309.103	297.099	294.098	300.1
Dashehari	8.736	8.064	8.4	8.4	Dashehari	8.736	8.064	8.4	8.4	Dashehari	434.2	400.8	417.5	417.5
Fazli	8.944	8.256	8.6	8.6	Fazli	8.528	7.872	8.2	8.2	Fazli	531.024	490.176	510.6	510.6
Gulabkhas	10.282	11.236	10.282	10.6	Gulabkhas	6.014	6.572	6.014	6.2	Gulabkhas	391.395	427.71	391.395	403.5
Himsagar	8.051	8.798	8.051	8.3	Himsagar	7.081	7.738	7.081	7.3	Himsagar	332.807	363.686	332.807	343.1
Jawahar	9.215	8.93	10.355	9.5	Jawahar	6.499	6.298	7.303	6.7	Jawahar	373.062	361.524	419.214	384.6
Krishna Bhog	8.245	9.01	8.245	8.5	Krishna Bhog	5.626	6.148	5.626	5.8	Krishna Bhog	438.634	479.332	438.634	452.2
Langra	6.3	6.174	6.426	6.3	Langra	5.5	5.39	5.61	5.5	Langra	353	345.94	360.06	353
Mahmood Bahar	9.152	8.448	8.8	8.8	Mahmood Bahar	9.048	8.352	8.7	8.7	Mahmood Bahar	346.32	319.68	333	333
Malda	6.6	6.468	6.732	6.6	Malda	8.6	8.428	8.772	8.6	Malda	560.6	549.388	571.812	560.6
Mallika	8.245	7.99	9.265	8.5	Mallika	8.342	8.084	9.374	8.6	Mallika	408.661	396.022	459.217	421.3
Prabha Sankar	8.918	9.464	8.918	9.1	Prabha Sankar	6.174	6.552	6.174	6.3	Prabha Sankar	447.468	474.864	447.468	456.6
Ratna	7.8	7.644	7.956	7.8	Ratna	8.4	8.232	8.568	8.4	Ratna	513.3	503.034	523.566	513.3
Safed Malda	9.785	9.405	9.31	9.5	Safed Malda	8.755	8.415	8.33	8.5	Safed Malda	515	495	490	500
Suvarnarekha	9.464	8.736	9.1	9.1	Suvarnarekha	8.008	7.392	7.7	7.7	Suvarnarekha	486.512	449.088	467.8	467.8
Totapuri	13.52	12.48	13	13	Totapuri	6.552	6.048	6.3	6.3	Totapuri	309.4	285.6	297.5	297.5
Zardalu	8.961	8.613	8.526	8.7	Zardalu	9.064	8.712	8.624	8.8	Zardalu	424.566	408.078	403.956	412.2
	RESPIRATION RATE					TITRABLE ACIDITY					ASCORBIC ACID
				mean					mean					mean
	R1	R2	R3			R1	R2	R3			R1	R2	R3
Alphonso	105.125	111.561	105.125	107.27	Alphonso	0.245	0.26	0.245	0.25	Alphonso	19.992	21.216	19.992	20.4
Amrapali	104.123	100.079	99.0682	101.09	Amrapali	0.1442	0.1386	0.1372	0.14	Amrapali	25.132	24.156	23.912	24.4
Bombai	114.67	105.85	110.26	110.26	Bombai	0.2184	0.2016	0.21	0.21	Bombai	21.632	19.968	20.8	20.8
Chausa	141.306	135.818	134.446	137.19	Chausa	0.2163	0.2079	0.2058	0.21	Chausa	15.759	15.147	14.994	15.3
Dashehari	115.825	106.915	111.37	111.37	Dashehari	0.3016	0.2784	0.29	0.29	Dashehari	29.744	27.456	28.6	28.6
Fazli	106.205	98.0352	102.12	102.12	Fazli	0.3432	0.3168	0.33	0.33	Fazli	31.512	29.088	30.3	30.3
Gulabkhas	117.68	128.599	117.68	121.32	Gulabkhas	0.2134	0.2332	0.2134	0.22	Gulabkhas	29.003	31.694	29.003	29.9
Himsagar	130.766	142.899	130.766	134.81	Himsagar	0.1164	0.1272	0.1164	0.12	Himsagar	14.841	16.218	14.841	15.3
Jawahar	102.442	99.2734	115.115	105.61	Jawahar	0.2328	0.2256	0.2616	0.24	Jawahar	42.874	41.548	48.178	44.2
Krishna Bhog	109.057	119.176	109.057	112.43	Krishna Bhog	0.1552	0.1696	0.1552	0.16	Krishna Bhog	22.601	24.698	22.601	23.3
Langra	115.63	113.317	117.943	115.63	Langra	0.21	0.2058	0.2142	0.21	Langra	41.4	40.572	42.228	41.4
Mahmood Bahar	114.972	106.128	110.55	110.55	Mahmood Bahar	0.3328	0.3072	0.32	0.32	Mahmood Bahar	27.664	25.536	26.6	26.6
Malda	97.54	95.5892	99.4908	97.54	Malda	0.35	0.343	0.357	0.35	Malda	40.4	39.592	41.208	40.4
Mallika	127.419	123.478	143.182	131.36	Mallika	0.1649	0.1598	0.1853	0.17	Mallika	27.742	26.884	31.174	28.6
Prabha Sankar	118.198	125.434	118.198	120.61	Prabha Sankar	0.3626	0.3848	0.3626	0.37	Prabha Sankar	27.734	29.432	27.734	28.3
Ratna	104.5	102.41	106.59	104.5	Ratna	0.23	0.2254	0.2346	0.23	Ratna	14.5	14.21	14.79	14.5
Safed Malda	98.3032	94.4856	93.5312	95.44	Safed Malda	0.3296	0.3168	0.3136	0.32	Safed Malda	38.625	37.125	36.75	37.5
Suvarnarekha	100.516	92.784	96.65	96.65	Suvarnarekha	0.364	0.336	0.35	0.35	Suvarnarekha	41.288	38.112	39.7	39.7
Totapuri	141.149	130.291	135.72	135.72	Totapuri	0.1976	0.1824	0.19	0.19	Totapuri	29.744	27.456	28.6	28.6
Zardalu	113.063	108.672	107.575	109.77	Zardalu	0.1751	0.1683	0.1666	0.17	Zardalu	39.552	38.016	37.632	38.4
		SENSORY EVALUATION				TOTAL SOLUBLE SOLIDS
				mean					mean
	R1	R2	R3			R1	R2	R3
Alphonso	7.84	8.32	7.84	8	Alphonso	21.364	22.672	21.364	21.8
Amrapali	9.27	8.91	8.82	9	Amrapali	25.956	24.948	24.696	25.2
Bombai	8.112	7.488	7.8	7.8	Bombai	16.952	15.648	16.3	16.3
Chausa	8.549	8.217	8.134	8.3	Chausa	22.66	21.78	21.56	22
Dashehari	8.528	7.872	8.2	8.2	Dashehari	23.712	21.888	22.8	22.8
Fazli	9.152	8.448	8.8	8.8	Fazli	17.68	16.32	17	17
Gulabkhas	8.245	9.01	8.245	8.5	Gulabkhas	18.624	20.352	18.624	19.2
Himsagar	7.663	8.374	7.663	7.9	Himsagar	19.691	21.518	19.691	20.3
Jawahar	8.342	8.084	9.374	8.6	Jawahar	17.46	16.92	19.62	18
Krishna Bhog	8.051	8.798	8.051	8.3	Krishna Bhog	17.266	18.868	17.266	17.8
Langra	7.9	7.742	8.058	7.9	Langra	21.6	21.168	22.032	21.6
Mahmood Bahar	9.048	8.352	8.7	8.7	Mahmood Bahar	20.176	18.624	19.4	19.4
Malda	9	8.82	9.18	9	Malda	18	17.64	18.36	18
Mallika	8.536	8.272	9.592	8.8	Mallika	22.989	22.278	25.833	23.7
Prabha Sankar	7.546	8.008	7.546	7.7	Prabha Sankar	17.346	18.408	17.346	17.7
Ratna	8.8	8.624	8.976	8.8	Ratna	20.1	19.698	20.502	20.1
Safed Malda	8.652	8.316	8.232	8.4	Safed Malda	18.025	17.325	17.15	17.5
Suvarnarekha	8.944	8.256	8.6	8.6	Suvarnarekha	18.304	16.896	17.6	17.6
Totapuri	8.736	8.064	8.4	8.4	Totapuri	16.848	15.552	16.2	16.2
Zardalu	8.343	8.019	7.938	8.1	Zardalu	23.175	22.275	22.05	22.5
				MINERAL DETERMINATION
	PHOSPHOROUS					POTASSIUM						calcium
				mean					mean		R1	R2	R3	mean
GENOTYPES	R1	R2	R3		GENOTYPES	R1	R2	R3		GENOTYPES
Alphonso	1.6954	1.7992	1.6954	1.73	Alphonso	9.604	10.192	9.604	9.8	Alphonso	0.18	0.1764	0.1836	0.18
Amrapali	1.8025	1.7325	1.715	1.75	Amrapali	9.991	9.603	9.506	9.7	Amrapali	0.1545	0.1485	0.147	0.15
Bombai	1.6952	1.5648	1.63	1.63	Bombai	12.9584	11.9616	12.46	12.46	Bombai	0.1352	0.1248	0.13	0.13
Chausa	1.6583	1.5939	1.5778	1.61	Chausa	11.639	11.187	11.074	11.3	Chausa	0.1568	0.1664	0.1568	0.16
Dashehari	1.7368	1.6032	1.67	1.67	Dashehari	9.991	9.603	9.506	9.7	Dashehari	0.1746	0.1692	0.1962	0.18
Fazli	1.6848	1.5552	1.62	1.62	Fazli	10.296	9.504	9.9	9.9	Fazli	0.2	0.196	0.204	0.2
Gulabkhas	1.0185	1.113	1.0185	1.05	Gulabkhas	10.712	9.888	10.3	10.3	Gulabkhas	0.1442	0.1386	0.1372	0.14
Himsagar	1.0088	1.1024	1.0088	1.04	Himsagar	10.379	11.342	10.379	10.7	Himsagar	0.1144	0.1056	0.11	0.11
Jawahar	1.5229	1.4758	1.7113	1.57	Jawahar	8.961	8.613	8.526	8.7	Jawahar	0.2328	0.2544	0.2328	0.24
Krishna Bhog	1.5811	1.7278	1.5811	1.63	Krishna Bhog	9.118	8.836	10.246	9.4	Krishna Bhog	0.3016	0.2784	0.29	0.29
Langra	0.93	0.9114	0.9486	0.93	Langra	9.312	10.176	9.312	9.6	Langra	0.2134	0.2332	0.2134	0.22
Mahmood Bahar	1.716	1.584	1.65	1.65	Mahmood Bahar	5.6	5.488	5.712	5.6	Mahmood Bahar	0.392	0.416	0.392	0.4
Malda	1.77	1.7346	1.8054	1.77	Malda	6.6	6.468	6.732	6.6	Malda	0.1164	0.1128	0.1308	0.12
Mallika	1.4744	1.4288	1.6568	1.52	Mallika	9.048	8.352	8.7	8.7	Mallika	0.33	0.3234	0.3366	0.33
Prabha Sankar	1.5582	1.6536	1.5582	1.59	Prabha Sankar	12.669	12.177	12.054	12.3	Prabha Sankar	0.2678	0.2574	0.2548	0.26
Ratna	1.6	1.568	1.632	1.6	Ratna	11.648	10.752	11.2	11.2	Ratna	0.1067	0.1166	0.1067	0.11
Safed Malda	1.8025	1.7325	1.715	1.75	Safed Malda	11.8	11.564	12.036	11.8	Safed Malda	0.1274	0.1352	0.1274	0.13
Suvarnarekha	1.8304	1.6896	1.76	1.76	Suvarnarekha	11.5	11.27	11.73	11.5	Suvarnarekha	0.3492	0.3384	0.3924	0.36
Totapuri	1.404	1.296	1.35	1.35	Totapuri	10.767	10.434	12.099	11.1	Totapuri	0.14	0.1372	0.1428	0.14
Zardalu	1.7201	1.6533	1.6366	1.67	Zardalu	9.568	8.832	9.2	9.2	Zardalu	0.3502	0.3366	0.3332	0.34
	PG ENZYMATIC ACTIVITY					PME ENZYMATIC ACTIVITY					LOX ENZYMATIC ACTIVITY
				mean					mean					mean
	R1	R2	R3			R1	R2	R3			R1	R2	R3
Alphonso	32.7516	34.7568	32.7516	33.42	Alphonso	0.343	0.364	0.343	0.35	Alphonso	3.87296	4.11008	3.87296	3.952
Amrapali	32.9909	31.7097	31.3894	32.03	Amrapali	0.3399	0.3267	0.3234	0.33	Amrapali	3.48964	3.35412	3.32024	3.388
Bombai	32.864	30.336	31.6	31.6	Bombai	0.3432	0.3168	0.33	0.33	Bombai	4.63632	4.27968	4.458	4.458
Chausa	37.3993	35.9469	35.5838	36.31	Chausa	0.412	0.396	0.392	0.4	Chausa	5.72371	5.50143	5.44586	5.557
Dashehari	34.0288	31.4112	32.72	32.72	Dashehari	0.3848	0.3552	0.37	0.37	Dashehari	4.62592	4.27008	4.448	4.448
Fazli	35.2976	32.5824	33.94	33.94	Fazli	0.3328	0.3072	0.32	0.32	Fazli	3.94264	3.63936	3.791	3.791
Gulabkhas	32.2622	35.2556	32.2622	33.26	Gulabkhas	0.3492	0.3816	0.3492	0.36	Gulabkhas	4.68704	5.12192	4.68704	4.832
Himsagar	35.7251	39.0398	35.7251	36.83	Himsagar	0.3686	0.4028	0.3686	0.38	Himsagar	4.58713	5.01274	4.58713	4.729
Jawahar	30.6229	29.6758	34.4113	31.57	Jawahar	0.3492	0.3384	0.3924	0.36	Jawahar	3.23689	3.13678	3.63733	3.337
Krishna Bhog	31.2922	34.1956	31.2922	32.26	Krishna Bhog	0.3492	0.3816	0.3492	0.36	Krishna Bhog	3.21264	3.51072	3.21264	3.312
Langra	33.51	32.8398	34.1802	33.51	Langra	0.39	0.3822	0.3978	0.39	Langra	4.482	4.39236	4.57164	4.482
Mahmood Bahar	33.3216	30.7584	32.04	32.04	Mahmood Bahar	0.3744	0.3456	0.36	0.36	Mahmood Bahar	3.68368	3.40032	3.542	3.542
Malda	32.43	31.7814	33.0786	32.43	Malda	0.3	0.294	0.306	0.3	Malda	3.177	3.11346	3.24054	3.177
Mallika	32.8248	31.8096	36.8856	33.84	Mallika	0.3201	0.3102	0.3597	0.33	Mallika	4.02744	3.90288	4.52568	4.152
Prabha Sankar	34.6626	36.7848	34.6626	35.37	Prabha Sankar	0.3528	0.3744	0.3528	0.36	Prabha Sankar	4.08856	4.33888	4.08856	4.172
Ratna	34.63	33.9374	35.3226	34.63	Ratna	0.33	0.3234	0.3366	0.33	Ratna	3.634	3.56132	3.70668	3.634
Safed Malda	32.6716	31.4028	31.0856	31.72	Safed Malda	0.3296	0.3168	0.3136	0.32	Safed Malda	3.31248	3.18384	3.15168	3.216
Suvarnarekha	34.1744	31.5456	32.86	32.86	Suvarnarekha	0.3224	0.2976	0.31	0.31	Suvarnarekha	3.93328	3.63072	3.782	3.782
Totapuri	37.6272	34.7328	36.18	36.18	Totapuri	0.3848	0.3552	0.37	0.37	Totapuri	4.33992	4.00608	4.173	4.173
Zardalu	33.4853	32.1849	31.8598	32.51	Zardalu	0.3708	0.3564	0.3528	0.36	Zardalu	4.01185	3.85605	3.8171	3.895
	TOTAL SUGARS					FLAVONOID CONTENT					ANTIOXIDANT ACTIVITY
				mean					mean					mean
GENOTYPES	R1	R2	R3		GENOTYPES	R1	R2	R3		GENOTYPES	R1	R2	R3
Alphonso	17.7772	18.8656	17.7772	18.14	Alphonso	398.86	423.28	398.86	407	Alphonso	3.7926	4.0248	3.7926	3.87
Amrapali	19.9511	19.1763	18.9826	19.37	Amrapali	607.7	584.1	578.2	590	Amrapali	5.5826	5.3658	5.3116	5.42
Bombai	16.0264	14.7936	15.41	15.41	Bombai	381.68	352.32	367	367	Bombai	5.772	5.328	5.55	5.55
Chausa	15.7693	15.1569	15.0038	15.31	Chausa	545.9	524.7	519.4	530	Chausa	3.3475	3.2175	3.185	3.25
Dashehari	17.7008	16.3392	17.02	17.02	Dashehari	402.896	371.904	387.4	387.4	Dashehari	4.8152	4.4448	4.63	4.63
Fazli	16.692	15.408	16.05	16.05	Fazli	420.16	387.84	404	404	Fazli	3.5464	3.2736	3.41	3.41
Gulabkhas	15.5588	17.0024	15.5588	16.04	Gulabkhas	418.07	456.86	418.07	431	Gulabkhas	3.7248	4.0704	3.7248	3.84
Himsagar	16.0729	17.5642	16.0729	16.57	Himsagar	344.35	376.3	344.35	355	Himsagar	3.6181	3.9538	3.6181	3.73
Jawahar	16.5967	16.0834	18.6499	17.11	Jawahar	496.64	481.28	558.08	512	Jawahar	3.4505	3.3165	3.283	3.35
Krishna Bhog	18.2554	19.9492	18.2554	18.82	Krishna Bhog	436.5	477	436.5	450	Krishna Bhog	3.5017	3.3934	3.9349	3.61
Langra	16.75	16.415	17.085	16.75	Langra	550.3	539.294	561.306	550.3	Langra	3.31	3.2438	3.3762	3.31
Mahmood Bahar	15.6624	14.4576	15.06	15.06	Mahmood Bahar	585.52	540.48	563	563	Mahmood Bahar	4.3368	4.0032	4.17	4.17
Malda	17.2	16.856	17.544	17.2	Malda	620	607.6	632.4	620	Malda	5.79	5.6742	5.9058	5.79
Mallika	19.5164	18.9128	21.9308	20.12	Mallika	679	658	763	700	Mallika	5.0828	4.9256	5.7116	5.24
Prabha Sankar	17.2578	18.3144	17.2578	17.61	Prabha Sankar	441	468	441	450	Prabha Sankar	3.3269	3.1977	3.1654	3.23
Ratna	16.21	15.8858	16.5342	16.21	Ratna	611	598.78	623.22	611	Ratna	3.87	3.7926	3.9474	3.87
Safed Malda	16.4697	15.8301	15.6702	15.99	Safed Malda	676.71	650.43	643.86	657	Safed Malda	4.2238	4.4824	4.2238	4.31
Suvarnarekha	15.8184	14.6016	15.21	15.21	Suvarnarekha	686.4	633.6	660	660	Suvarnarekha	5.6341	5.4153	5.3606	5.47
Totapuri	15.9536	14.7264	15.34	15.34	Totapuri	485.68	448.32	467	467	Totapuri	2.6416	2.4384	2.54	2.54
Zardalu	14.8011	14.2263	14.0826	14.37	Zardalu	556.2	534.6	529.2	540	Zardalu	4.3157	4.1481	4.1062	4.19
	FRUIT WEIGHT					dry seed weight					PEEL THICKNESS
GENOTYPES	R1	R2	R3	mean		R1	R2	R3	mean	GENOTYPES	R1	R2	R3	mean
Alphonso	176.9	132.8	157.7	155.8	Alphonso	14.8	16	12.7	14.5	Alphonso	0.6272	0.6656	0.6272	0.64
Amrapali	180.6	172.9	135.6	163.033	Amrapali	20.3	17.2	18.5	18.6667	Amrapali	0.7519	0.7227	0.7154	0.73
Bombai	164.2	133.5	151.6	149.767	Bombai	14.2	15.5	13.3	14.3333	Bombai	1.1856	1.0944	1.14	1.14
Chausa	250.2	237.1	290.3	259.2	Chausa	29.5	22.9	24.7	25.7	Chausa	0.6386	0.6138	0.6076	0.62
Dashehari	141.5	155	117.8	138.1	Dashehari	12	12.7	11.2	11.9667	Dashehari	1.1336	1.0464	1.09	1.09
Fazli	412.6	401.8	399.6	404.667	Fazli	25.2	24.1	32.4	27.2333	Fazli	1.924	1.776	1.85	1.85
Gulabkhas	114.9	112.2	137.6	121.567	Gulabkhas	11.3	11.9	14.5	12.5667	Gulabkhas	1.1737	1.2826	1.1737	1.21
Himsagar	170.9	135.6	159.2	155.233	Himsagar	15.1	21.4	17	17.8333	Himsagar	0.7178	0.7844	0.7178	0.74
Jawahar	198.4	187.5	200.2	195.367	Jawahar	15.7	17.4	15.2	16.1	Jawahar	1.0088	0.9776	1.1336	1.04
Krishna Bhog	269.3	243.4	285.9	266.2	Krishna Bhog	18.7	15	16.4	16.7	Krishna Bhog	1.067	1.166	1.067	1.1
Langra	223.4	214.7	208.2	215.433	Langra	18.3	17.3	19.1	18.2333	Langra	0.75	0.735	0.765	0.75
Mahmood Bahar	185.7	157.3	149.4	164.133	Mahmood Bahar	16	16.7	17	16.5667	Mahmood Bahar	1.5704	1.4496	1.51	1.51
Malda	220.5	250.4	261.1	244	Malda	19.3	17.7	20.1	19.0333	Malda	0.73	0.7154	0.7446	0.73
Mallika	370	357	311	346	Mallika	21	20.8	22.1	21.3	Mallika	0.6208	0.6016	0.6976	0.64
Prabha Sankar	300.9	395.7	298.6	331.733	Prabha Sankar	22.1	21.8	21.1	21.6667	Prabha Sankar	1.3818	1.4664	1.3818	1.41
Ratna	245.6	278.6	240.8	255	Ratna	19.3	17.1	14.6	17	Ratna	0.89	0.8722	0.9078	0.89
Safed Malda	218.6	255.5	257.9	244	Safed Malda	20.3	19.1	17.6	19	Safed Malda	0.7313	0.7029	0.6958	0.71
Suvarnarekha	260.2	297.5	241.4	266.367	Suvarnarekha	18.6	16.8	21.3	18.9	Suvarnarekha	1.0816	0.9984	1.04	1.04
Totapuri	217.3	210.6	218.4	215.433	Totapuri	20.3	23.9	16.1	20.1	Totapuri	1.6744	1.5456	1.61	1.61
Zardalu	220.1	260.2	250.4	243.567	Zardalu	15.5	15.4	14.6	15.1667	Zardalu	1.1433	1.0989	1.0878	1.11
		FRUIT FIRMNESS
				mean
	R1	R2	R3
Alphonso	5.0078	5.3144	5.0078	5.11
Amrapali	5.1294	4.9302	4.8804	4.98
Bombai	4.4408	4.0992	4.27	4.27
Chausa	4.9749	4.7817	4.7334	4.83
Dashehari	5.4808	5.0592	5.27	5.27
Fazli	5.9488	5.4912	5.72	5.72
Gulabkhas	4.6657	5.0986	4.6657	4.81
Himsagar	4.0061	4.3778	4.0061	4.13
Jawahar	5.9558	5.7716	6.6926	6.14
Krishna Bhog	6.6639	7.2822	6.6639	6.87
Langra	6.44	6.3112	6.5688	6.44
Mahmood Bahar	9.7448	8.9952	9.37	9.37
Malda	4.36	4.2728	4.4472	4.36
Mallika	7.1489	6.9278	8.0333	7.37
Prabha Sankar	6.6248	7.0304	6.6248	6.76
Ratna	4.35	4.263	4.437	4.35
Safed Malda	4.6762	4.4946	4.4492	4.54
Suvarnarekha	8.8504	8.1696	8.51	8.51
Totapuri	4.8984	4.5216	4.71	4.71
Zardalu	8.6726	8.3358	8.2516	8.42

## Sheet: Sheet3
	Column 1	Column 2	Column 3	Column 4	Column 5	Column 6	Column 7	Column 8	Column 9	Column 10	Column 11	Column 12	Column 13	Column 14	Column 15	Column 16	Column 17	Column 18	Column 19	Column 20	Column 21
Column 1	1
Column 2	-0.386218	1
Column 3	-0.366504	0.37302	1
Column 4	0.406057	-0.455952	-0.748751	1
Column 5	-0.0367803	0.190511	0.448047	-0.501958	1
Column 6	-0.078105	0.16578	0.147989	-0.441542	0.393922	1
Column 7	-0.202211	0.6197	0.277361	-0.360483	0.128423	0.171168	1
Column 8	-0.570597	0.336568	-0.200364	0.159873	-0.454634	-0.197114	0.0958792	1
Column 9	-0.114783	0.464521	0.532977	-0.57709	0.419647	0.0334067	0.342908	-0.0252733	1
Column 10	0.42865	-0.42486	0.0506573	0.174118	-0.0696585	-0.295179	-0.490604	-0.237525	-0.100717	1
Column 11	-0.0694232	0.174937	-0.159541	-0.0719671	0.172259	0.339028	0.0488538	0.0865705	0.213657	-0.398076	1
Column 12	0.187641	-0.289389	-0.43452	0.756724	-0.201601	-0.500298	-0.262296	0.0282565	-0.446155	0.369841	-0.275845	1
Column 13	0.138367	-0.47839	-0.822225	0.67462	-0.403954	-0.0728878	-0.3924	0.277077	-0.550073	-0.0790882	0.110623	0.370489	1
Column 14	0.328864	-0.527909	-0.574149	0.751105	-0.286644	-0.415649	-0.503361	0.218475	-0.539026	0.396823	-0.216207	0.61641	0.539068	1
Column 15	-0.501489	0.0842072	0.245092	0.0199368	-0.243405	-0.108767	0.189975	0.413445	0.0732045	-0.174594	-0.00697518	-0.0990888	-0.020175	-0.245787	1
Column 16	-0.25902	0.491114	0.190156	-0.295599	0.164586	0.385733	0.5903	0.210107	0.304848	-0.243593	0.315443	-0.240538	-0.251997	-0.417814	0.122769	1
Column 17	-0.267485	0.499634	0.520697	-0.476391	0.121076	0.134722	0.345597	0.208743	0.454027	-0.192141	0.0735695	-0.549099	-0.616984	-0.288138	0.210163	0.391395	1
Column 18	-0.0475193	0.141797	0.312392	-0.0272247	0.30757	0.14995	0.215097	-0.19146	0.240489	0.095504	0.298053	0.223857	-0.201234	-0.175584	0.134645	0.330342	-0.128566	1
Column 19	0.0219127	0.0113826	-0.0242339	0.199267	0.187602	-0.0570349	0.234837	-0.122537	0.0991115	0.135424	0.0231303	0.472346	-0.0512615	0.0881206	0.0234933	0.236882	-0.236891	0.78764	1
Column 20	0.489653	-0.0413871	-0.0813289	-0.00391795	0.33187	0.100406	0.0106363	-0.558961	-0.00633209	-0.0131108	0.247781	0.034921	-0.0565953	-0.0849423	-0.391335	-0.385597	-0.362464	0.231619	0.140029	1
Column 21	-0.0948035	0.206013	-0.169567	-0.10961	0.198298	0.376131	0.0498819	0.089119	0.174452	-0.405194	0.988686	-0.273647	0.0992683	-0.222873	-0.0883331	0.330932	0.0538821	0.270373	0.00971108	0.278967	1

## Sheet: Sheet1
	PL	TC	TPC	RR	TA	AC	SE	TSS	P	K	Ca	PGE	PME	LOX	TS	Flav	AA	FW	DSW	PT	FF
Genotypes	Physiological loss in weight	Total carotenoid	Total phenolic content	Respiration rate	Titrable acidity	Ascorbic acid	Sensory evaluation	Total soluble solid	Phosphorus	Potassium	Calcium	PGE	PME	LOX	Total sugar	Flavanoid	Antioxidant	Fruit weight	Dr seed weight	Peel thickness	Fruit firmness
Alphonso	6.4	6.6	475.5	107.27	0.25	20.4	8	21.8	1.73	9.8	0.18	33.42	0.343	3.952	18.14	407	3.87	155.8	14.5	0.64	5.11
Amrapali	6.2	9.1	443.3	101.09	0.14	24.4	9	25.2	1.75	9.7	0.15	32.03	0.3234	3.388	19.37	590	5.42	163.033	18.6667	0.73	4.98
Bombai	11.9	5.6	469.3	110.26	0.21	20.8	7.8	16.3	1.63	12.46	0.13	31.6	0.33	4.458	15.41	367	5.55	149.767	14.3333	1.14	4.27
Chausa	10	5.6	300.1	137.19	0.21	15.3	8.3	22	1.61	11.3	0.16	36.31	0.392	5.557	15.31	530	3.25	259.2	25.7	0.62	4.83
Dashehari	8.4	8.4	417.5	111.37	0.29	28.6	8.2	22.8	1.67	9.7	0.18	32.72	0.37	4.448	17.02	387.4	4.63	138.1	11.9667	1.09	5.27
Fazli	8.6	8.2	510.6	102.12	0.33	30.3	8.8	17	1.62	9.9	0.2	33.94	0.32	3.791	16.05	404	3.41	404.667	27.2333	1.85	5.72
Gulabkhas	10.6	6.2	403.5	121.32	0.22	29.9	8.5	19.2	1.05	10.3	0.14	33.26	0.3492	4.832	16.04	431	3.84	121.567	12.5667	1.21	4.81
Himsagar	8.3	7.3	343.1	134.81	0.12	15.3	7.9	20.3	1.04	10.7	0.11	36.83	0.3686	4.729	16.57	355	3.73	155.233	17.8333	0.74	4.13
Jawahar	9.5	6.7	384.6	105.61	0.24	44.2	8.6	18	1.57	8.7	0.24	31.57	0.3924	3.337	17.11	512	3.35	195.367	16.1	1.04	6.14
Krishna Bhog	8.5	5.8	452.2	112.43	0.16	23.3	8.3	17.8	1.63	9.4	0.29	32.26	0.3492	3.312	18.82	450	3.61	266.2	16.7	1.1	6.87
Langra	6.3	5.5	353	115.63	0.21	41.4	7.9	21.6	0.93	9.6	0.22	33.51	0.3978	4.482	16.75	550.3	3.31	215.433	18.2333	0.75	6.44
Mahmood Bahar	8.8	8.7	333	110.55	0.32	26.6	8.7	19.4	1.65	5.6	0.4	32.04	0.36	3.542	15.06	563	4.17	164.133	16.5667	1.51	9.37
Malda	6.6	8.6	560.6	97.54	0.35	40.4	9	18	1.77	6.6	0.12	32.43	0.306	3.177	17.2	620	5.79	244	19.0333	0.73	4.36
Mallika	8.5	8.6	421.3	131.36	0.17	28.6	8.8	23.7	1.52	8.7	0.33	33.84	0.3597	4.152	20.12	700	5.24	346	21.3	0.64	7.37
Prabha Sankar	9.1	6.3	456.6	120.61	0.37	28.3	7.7	17.7	1.59	12.3	0.26	35.37	0.3528	4.172	17.61	450	3.23	331.733	21.6667	1.41	6.76
Ratna	7.8	8.4	513.3	104.5	0.23	14.5	8.8	20.1	1.6	11.2	0.11	34.63	0.3366	3.634	16.21	611	3.87	255	17	0.89	4.35
Safed Malda	9.5	8.5	500	95.44	0.32	37.5	8.4	17.5	1.75	11.8	0.13	31.72	0.3136	3.216	15.99	657	4.31	244	19	0.71	4.54
Suvarnarekha	9.1	7.7	467.8	96.65	0.35	39.7	8.6	17.6	1.76	11.5	0.36	32.86	0.31	3.782	15.21	660	5.47	266.367	18.9	1.04	8.51
Totapuri	13	6.3	297.5	135.72	0.19	28.6	8.4	16.2	1.35	11.1	0.14	36.18	0.37	4.173	15.34	467	2.54	215.433	20.1	1.61	4.71
Zardalu	8.7	8.8	412.2	109.77	0.17	38.4	8.1	22.5	1.67	9.2	0.34	32.51	0.3528	3.895	14.37	540	4.19	243.567	15.1667	1.11	8.42
